# Supplementary material
Source: Springer Nature journal article supplement (https://www.springermedizin.de/resource/supplementary/13014_2013_1167_MOESM1_ESM.pdf/9635048)

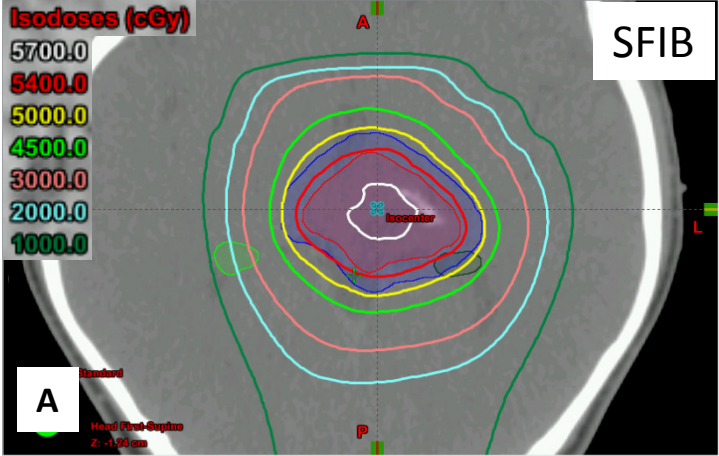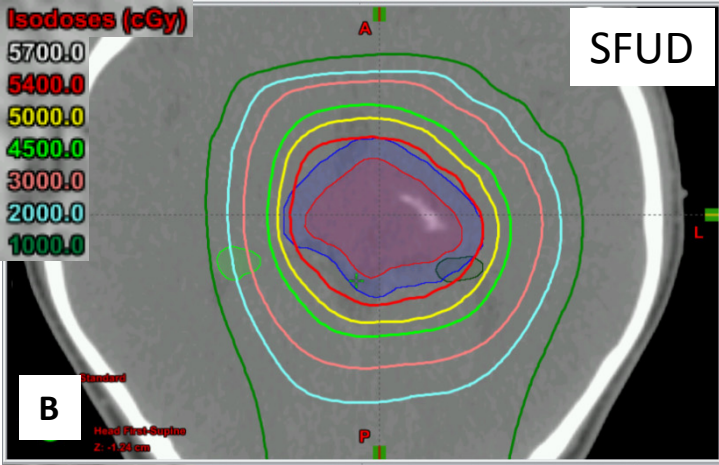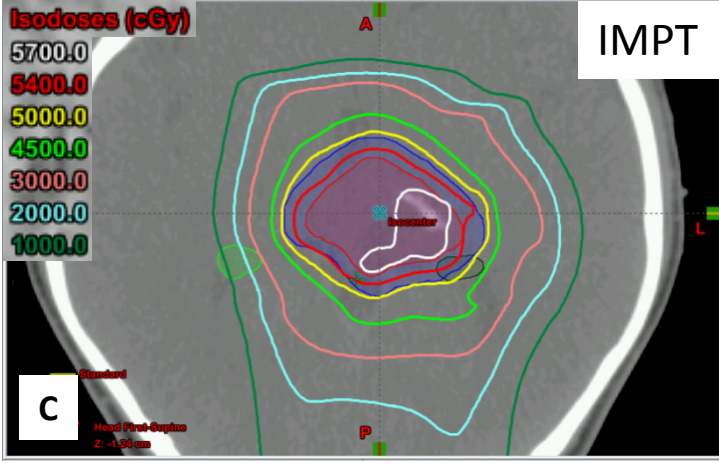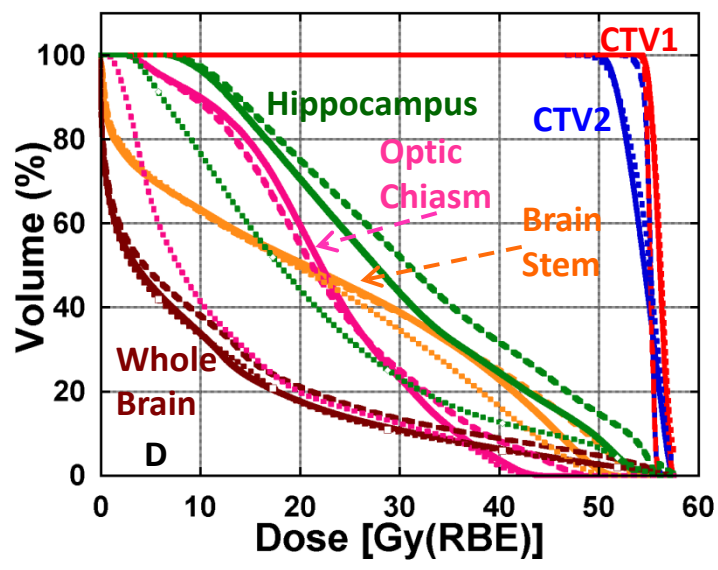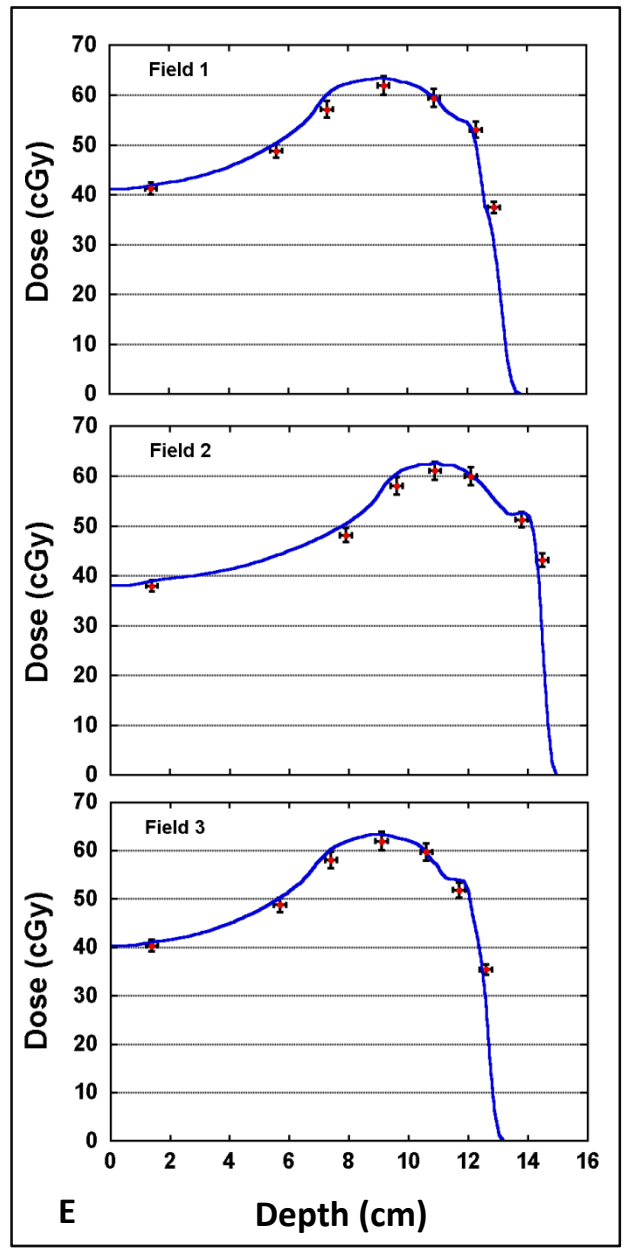

Supplement: MOESM1 [file 9635048]
